# Supplementary material for: Evaluating a muscle ultrasound education programme: theoretical knowledge, hands-on skills, reliability and satisfaction of critical care physiotherapists
Source: Research Square preprint supplement (doi:10.21203/rs.3.rs-482972/v1), 2021-05-03
Supplement: Supplementary file 1 [file 72d0c87f12a9e690800862ad.docx]

**Table S1**. Measurement procedure and reliability analysis used by instructors and participants groups of the muscle ultrasound education programme

|  | **Measurement procedure** | | | | |  | **Reliability analysis** | | |
| --- | --- | --- | --- | --- | --- | --- | --- | --- | --- |
| **Nº of Raters** | **Nº of thighs** | **Muscle parameter** | **Repeated measures** | **US devices** |  | **Reliability index** | **Type of reliability** | **ICC Model** |
| Instructors | 4 | 10 | Landmarks | 1 | Fujifilm Sonosite Edge II |  | ICC | Inter-rater | ICC2,1 |
| Thickness* | 2 |  | Inter, Intra-rater | ICC2,2, ICC3,1 |
| Pennation angle**†** | 2 |  | Inter, Intra-rater | ICC2,2, ICC3,1 |
| Group 1 | 4 | 6 | Landmarks | 1 | Sonus DUO LCP |  | ICC | Inter-rater | ICC2,1 |
| Thickness* | 2 |  | Inter, Intra-rater | ICC2,2, ICC3,1 |
| Pennation angle**†** | 2 |  | Inter, Intra-rater | ICC2,2, ICC3,1 |
| Group 2 | 4 | 6 | Landmarks | 1 | Sonus SL-2C |  | ICC | Inter-rater | ICC2,1 |
| Thickness* | 2 |  | Inter, Intra-rater | ICC2,2, ICC3,1 |
| Pennation angle**†** | 2 |  | Inter, Intra-rater | ICC2,2, ICC3,1 |
| Group 3 | 4 | 6 | Landmarks | 1 | Sonus DUO LCP & Philips Lumify |  | ICC | Inter-rater | ICC2,1 |
| Thickness* | 3 |  | Inter, Intra-rater | ICC2,3, ICC3,1 |
| Group 4 | 4 | 6 | Landmarks | 1 | Sonus SL-2C & Philips Lumify |  | ICC | Inter-rater | ICC2,1 |
| Thickness* | 3 |  | Inter, Intra-rater | ICC2,3, ICC3,1 |
| Group 5 | 3 | 6 | Landmarks | 1 | Philips InnoSight |  | ICC | Inter-rater | ICC2,1 |
| Pennation angle**†** | 4 |  | Inter, Intra-rater | ICC2,4, ICC3,1 |

* Muscle thickness was performed for rectus femoris, vastus intermedius and quadriceps complex (rectus femoris plus vastus intermedius).

**†** Pennation angle was performed for vastus lateralis.

ICC = intraclass correlation coefficient, US = ultrasound

**Table S2**. Muscle ultrasound education programme curriculum

|  | **Content** | **Method** | **Duration** |
| --- | --- | --- | --- |
| eLearning | Pre–reading material | Moodle™ platform***** | 6 hours during a 2–weeks periods |
| Training–videos |
| Instructor–led forum |
| eLearning questionnaire |
| In-person course: Day 1 | Pre–course questionnaire | Multiple–choice test | 30 min |
| Rationale for muscle US in ICU | Lecture | 30 min |
| US physics | Lecture | 40 min |
| Knobology Part I | Lecture | 30 min |
| Knobology Part II | Hands–on | 60 min |
| Muscle anatomy and physiology | Lecture | 30 min |
| Anatomic landmarks Part I | Lecture | 15 min |
| Anatomic landmarks Part II | Hands–on | 30 min |
| MUS images Part I | Lecture | 15 min |
| MUS images Part II | Hands–on | 60 min |
| MUS measurements Part I | Lecture | 15 min |
| MUS measurements Part II | Hands–on | 60 min |
|  | Total hours of training |  | 7 hours |
|  | Total hours of break |  | 2 hours |
| In-person course: Day 2 | Clinical relevance and future directions for MUS | Lecture | 20 min |
| Real–time MUS measurement in a volunteer | Hands–on | 30 min |
| MUS measurements Part III | Hands–on | 150 min |
| Reliability and practical skills assessment | Hands–on | 180 min |
| Post–course questionnaire | Multiple–choice test | 30 min |
| Satisfaction survey | Likert scale | 10 min |
|  | Total hours of training |  | 7 hours |
|  | Total hours of break |  | 2 hours |

* Learning management system designed to provide educators, administrators and learners with a single robust, secure and integrated system to create personalized learning environments. US = ultrasound, MUS = muscle ultrasound, ICU = intensive care unit

**Table S3**. eLearning training videos of muscle ultrasound education programme

| **Video title** | **Description** | **Duration** | **Free access link** |
| --- | --- | --- | --- |
| Entering patient data | Entering the patient data using a portable ultrasound machine (Sonosite Edge II, FUJIFILM, Inc.**©**) | 1:12 minutes | <https://www.youtube.com/watch?time_continue=34&v=Oi7dmbfQiTc> |
| Quadriceps thickness measurement | Thickness measurement of RF, VI and QC including patient positioning, knobology and landmarks | 2:46 minutes | <https://www.youtube.com/watch?time_continue=1&v=kWwoIYFm2a8> |
| Pennation angle measurement | Pennation angle measurement of VL, including patient positioning, knobology and landmarks | 2:27 minutes | <https://www.youtube.com/watch?time_continue=4&v=zOKA77d_WNQ> |
| Tibialis anterior thickness measurement | Thickness measurement of TA, including patient positioning, knobology and landmarks | 2:03 minutes | <https://www.youtube.com/watch?time_continue=4&v=8931vr6eGzs> |

RF = rectus femoris, VI = vastus intermedius, QC = quadriceps complex, VL = vastus lateralis, TA = tibialis anterior

**Table S4**. Satisfaction survey of muscle ultrasound education programme (n = 19)

| **Survey domain** | **Item** | **Likert scale*** | | | | **Percentage score†** |
| --- | --- | --- | --- | --- | --- | --- |
| **Strongly disagree** | **Disagree** | **Agree** | **Strongly agree** |
| General assessment | Do you think it was a good training program? | 0 (0.0) | 0 (0.0) | 1 (5.3) | 18 (94.7) | 97.5 ± 0.2 |
| Instructors were good | 0 (0.0) | 0 (0.0) | 0 (0.0) | 19 (100) | 100 ± 0.0 |
| Academic scope | The methodology was good | 0 (0.0) | 0 (0.0) | 1 (5.3) | 18 (94.7) | 97.5 ± 0.2 |
| The lessons improved my knowledge | 0 (0.0) | 0 (0.0) | 0 (0.0) | 19 (100) | 100 ± 0.0 |
| Teaching quality | They were good speakers | 0 (0.0) | 0 (0.0) | 1 (5.3) | 18 (94.7) | 97.5 ± 0.2 |
| They had a good command of the program issues | 0 (0.0) | 0 (0.0) | 1 (5.3) | 18 (94.7) | 97.5 ± 0.2 |
| They clearly conveyed the contents | 0 (0.0) | 0 (0.0) | 1 (5.3) | 18 (94.7) | 97.5 ± 0.2 |
| eLearning | The online module was a contribution to learning | 0 (0.0) | 0 (0.0) | 4 (21.1) | 15 (78.9) | 95 ± 0.4 |
| The online platform was friendly | 0 (0.0) | 1 (5.3) | 5 (26.3) | 13 (68.4) | 90 ± 0.6 |
| The platform was available when I wanted to access | 0 (0.0) | 0 (0.0) | 4 (21.1) | 15 (78.9) | 95 ± 0.4 |
| The instructor interaction contributed to my learning | 0 (0.0) | 0 (0.0) | 2 (10.5) | 17 (89.5) | 97.5 ± 0.3 |
| Pre-reading material | The academic support material was good | 0 (0.0) | 0 (0.0) | 6 (31.6) | 13 (68.4) | 92.5 ± 0.5 |
| Course coordination | There was good coordination of the program | 0 (0.0) | 0 (0.0) | 4 (21.1) | 15 (78.9) | 95 ± 0.4 |

Data are presented as count (percentage) for the Likert scale and as mean ± standard deviation for the percentage score.

* Each item was scored using the following Likert scale: 1 = Strongly disagree, 2 = Disagree, 3 = Agree, 4 = Strongly agree.

**†** Percentage score was calculated by dividing the score obtained by the total score, multiplied by 100 (percetage correct).

**
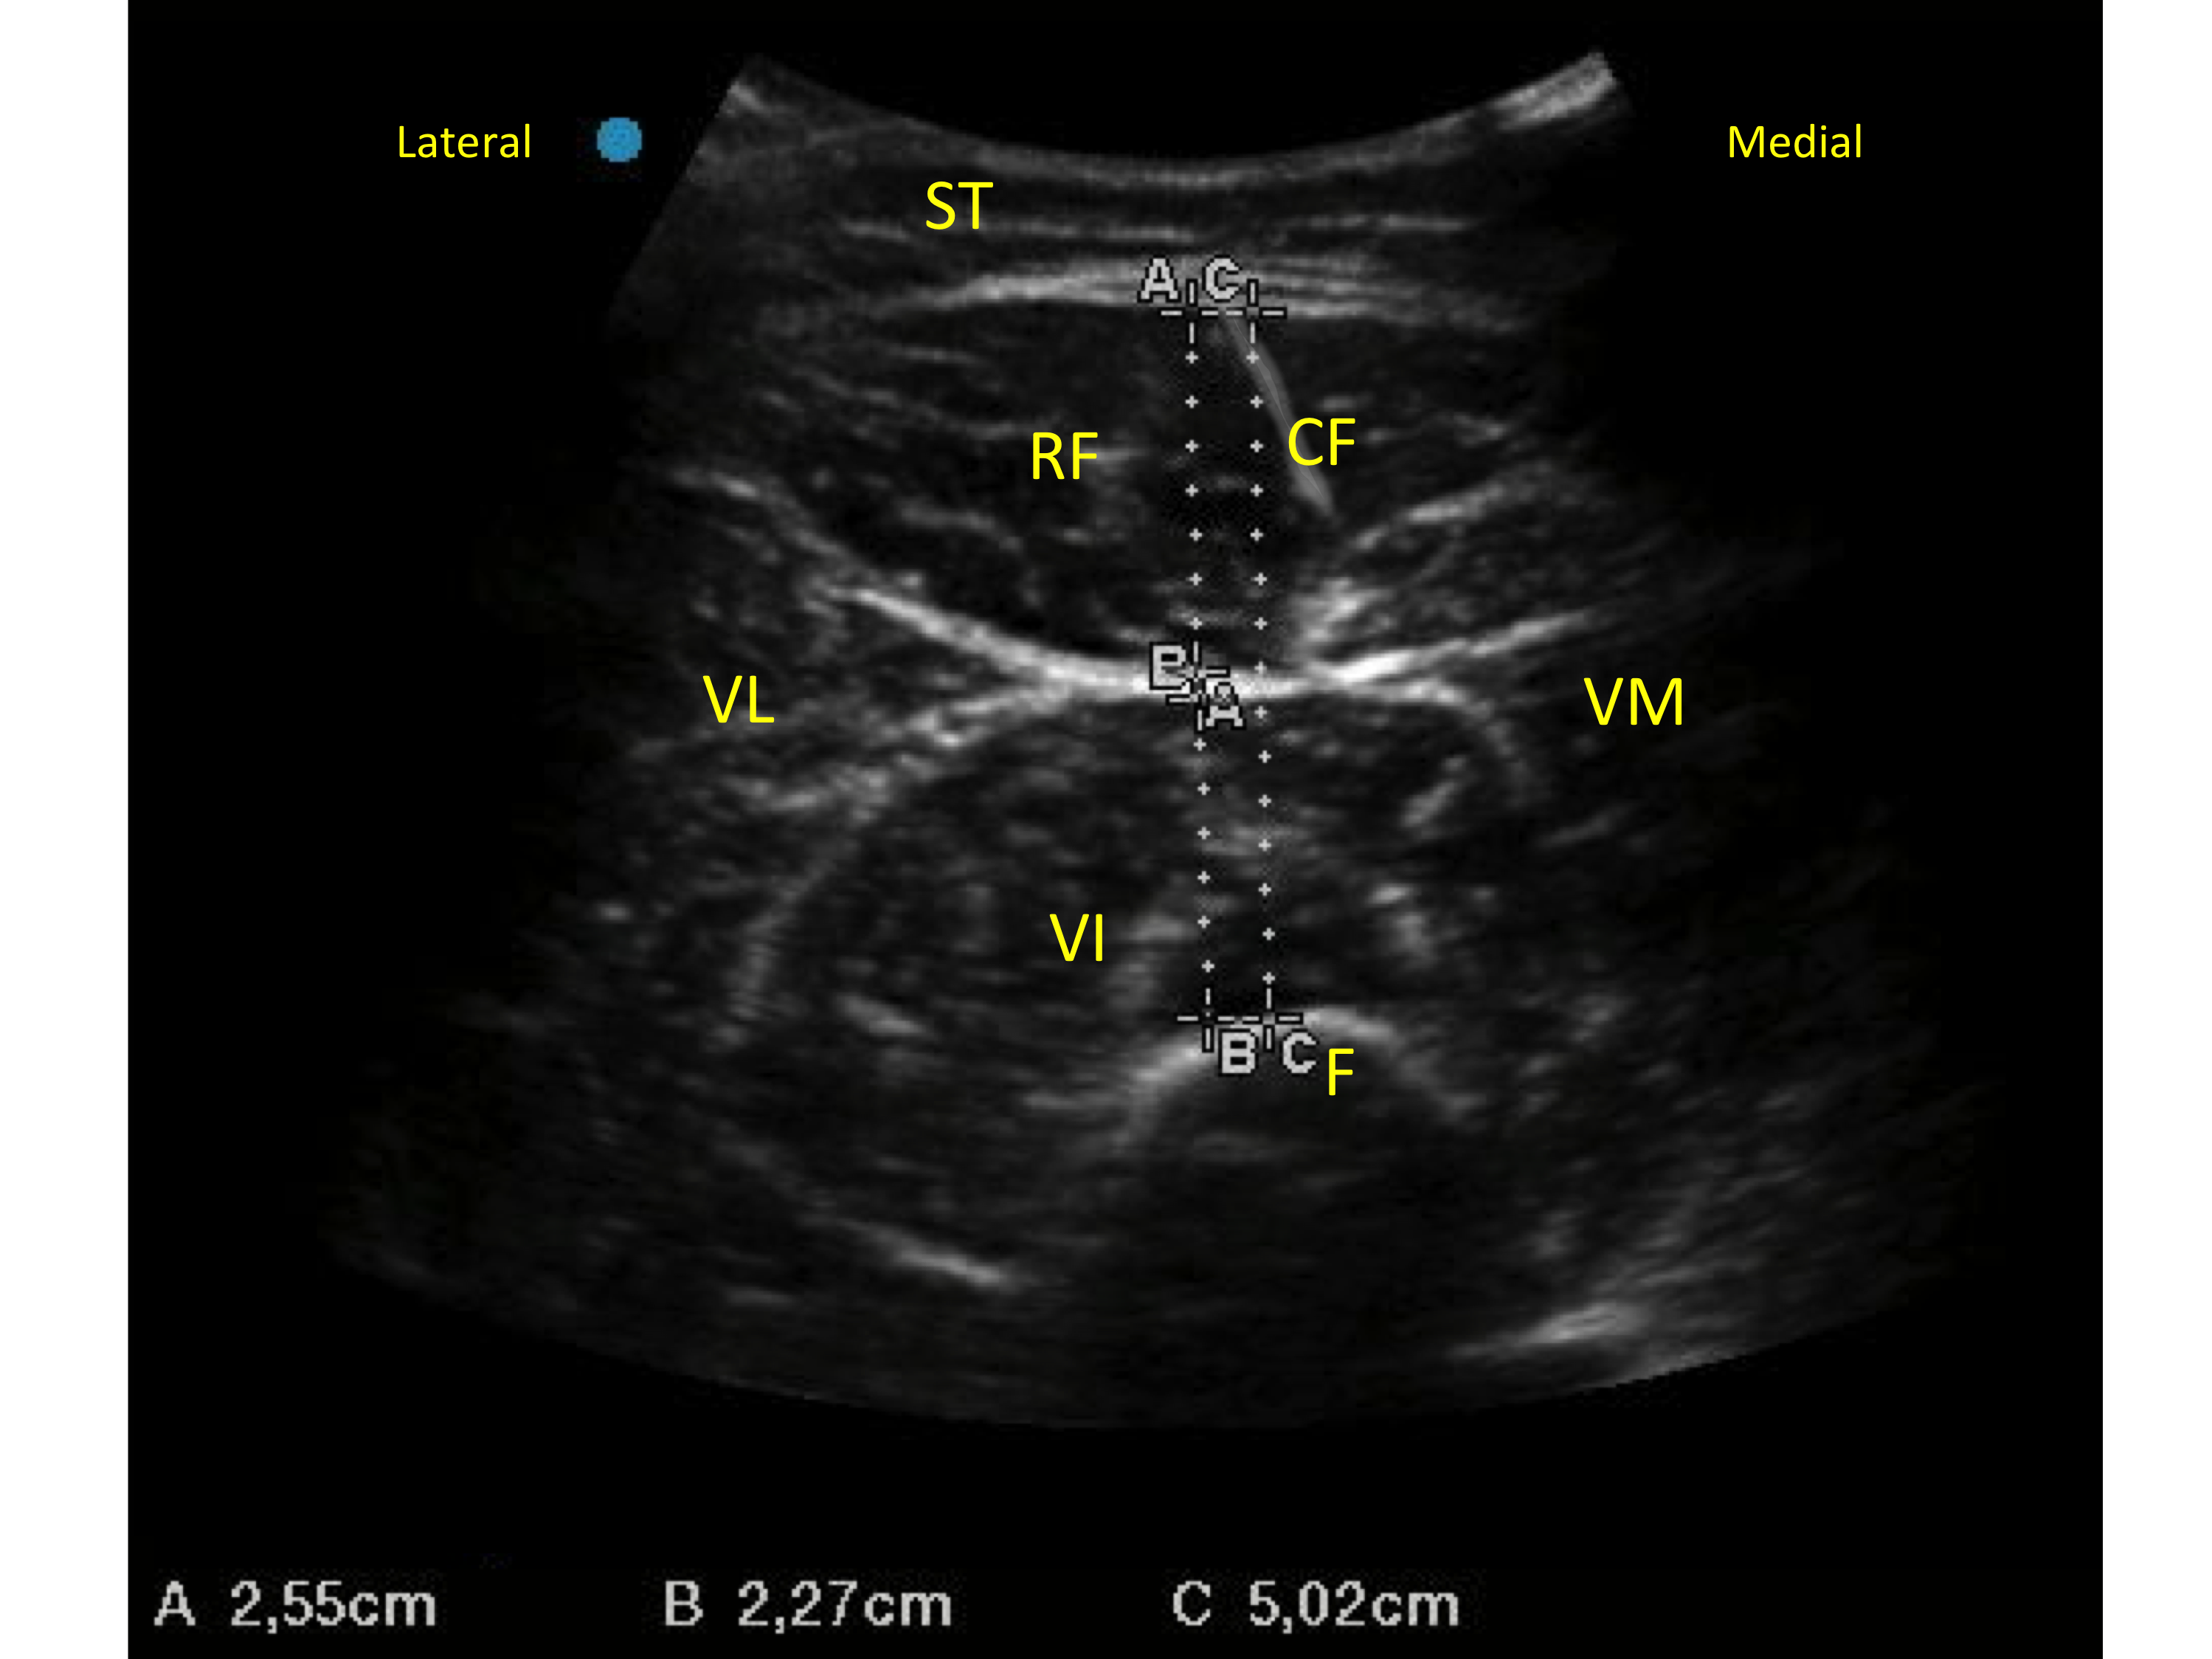
**

**Figure S1.** “Hourglass pattern” in a transverse cross-sectional view of quadriceps. A = Rectus femoris muscle thickness, B = Vastus intermedius muscle thickness, C = Quadriceps complex muscle thickness (rectus femoris + vastus intermedius), ST = subcutaneous tissue, RF = rectus femoris, VI = vastus intermedius, VL = vastus lateralis, VM = vastus medialis, F = femur, CF = central fascia of the rectus femoris.

**
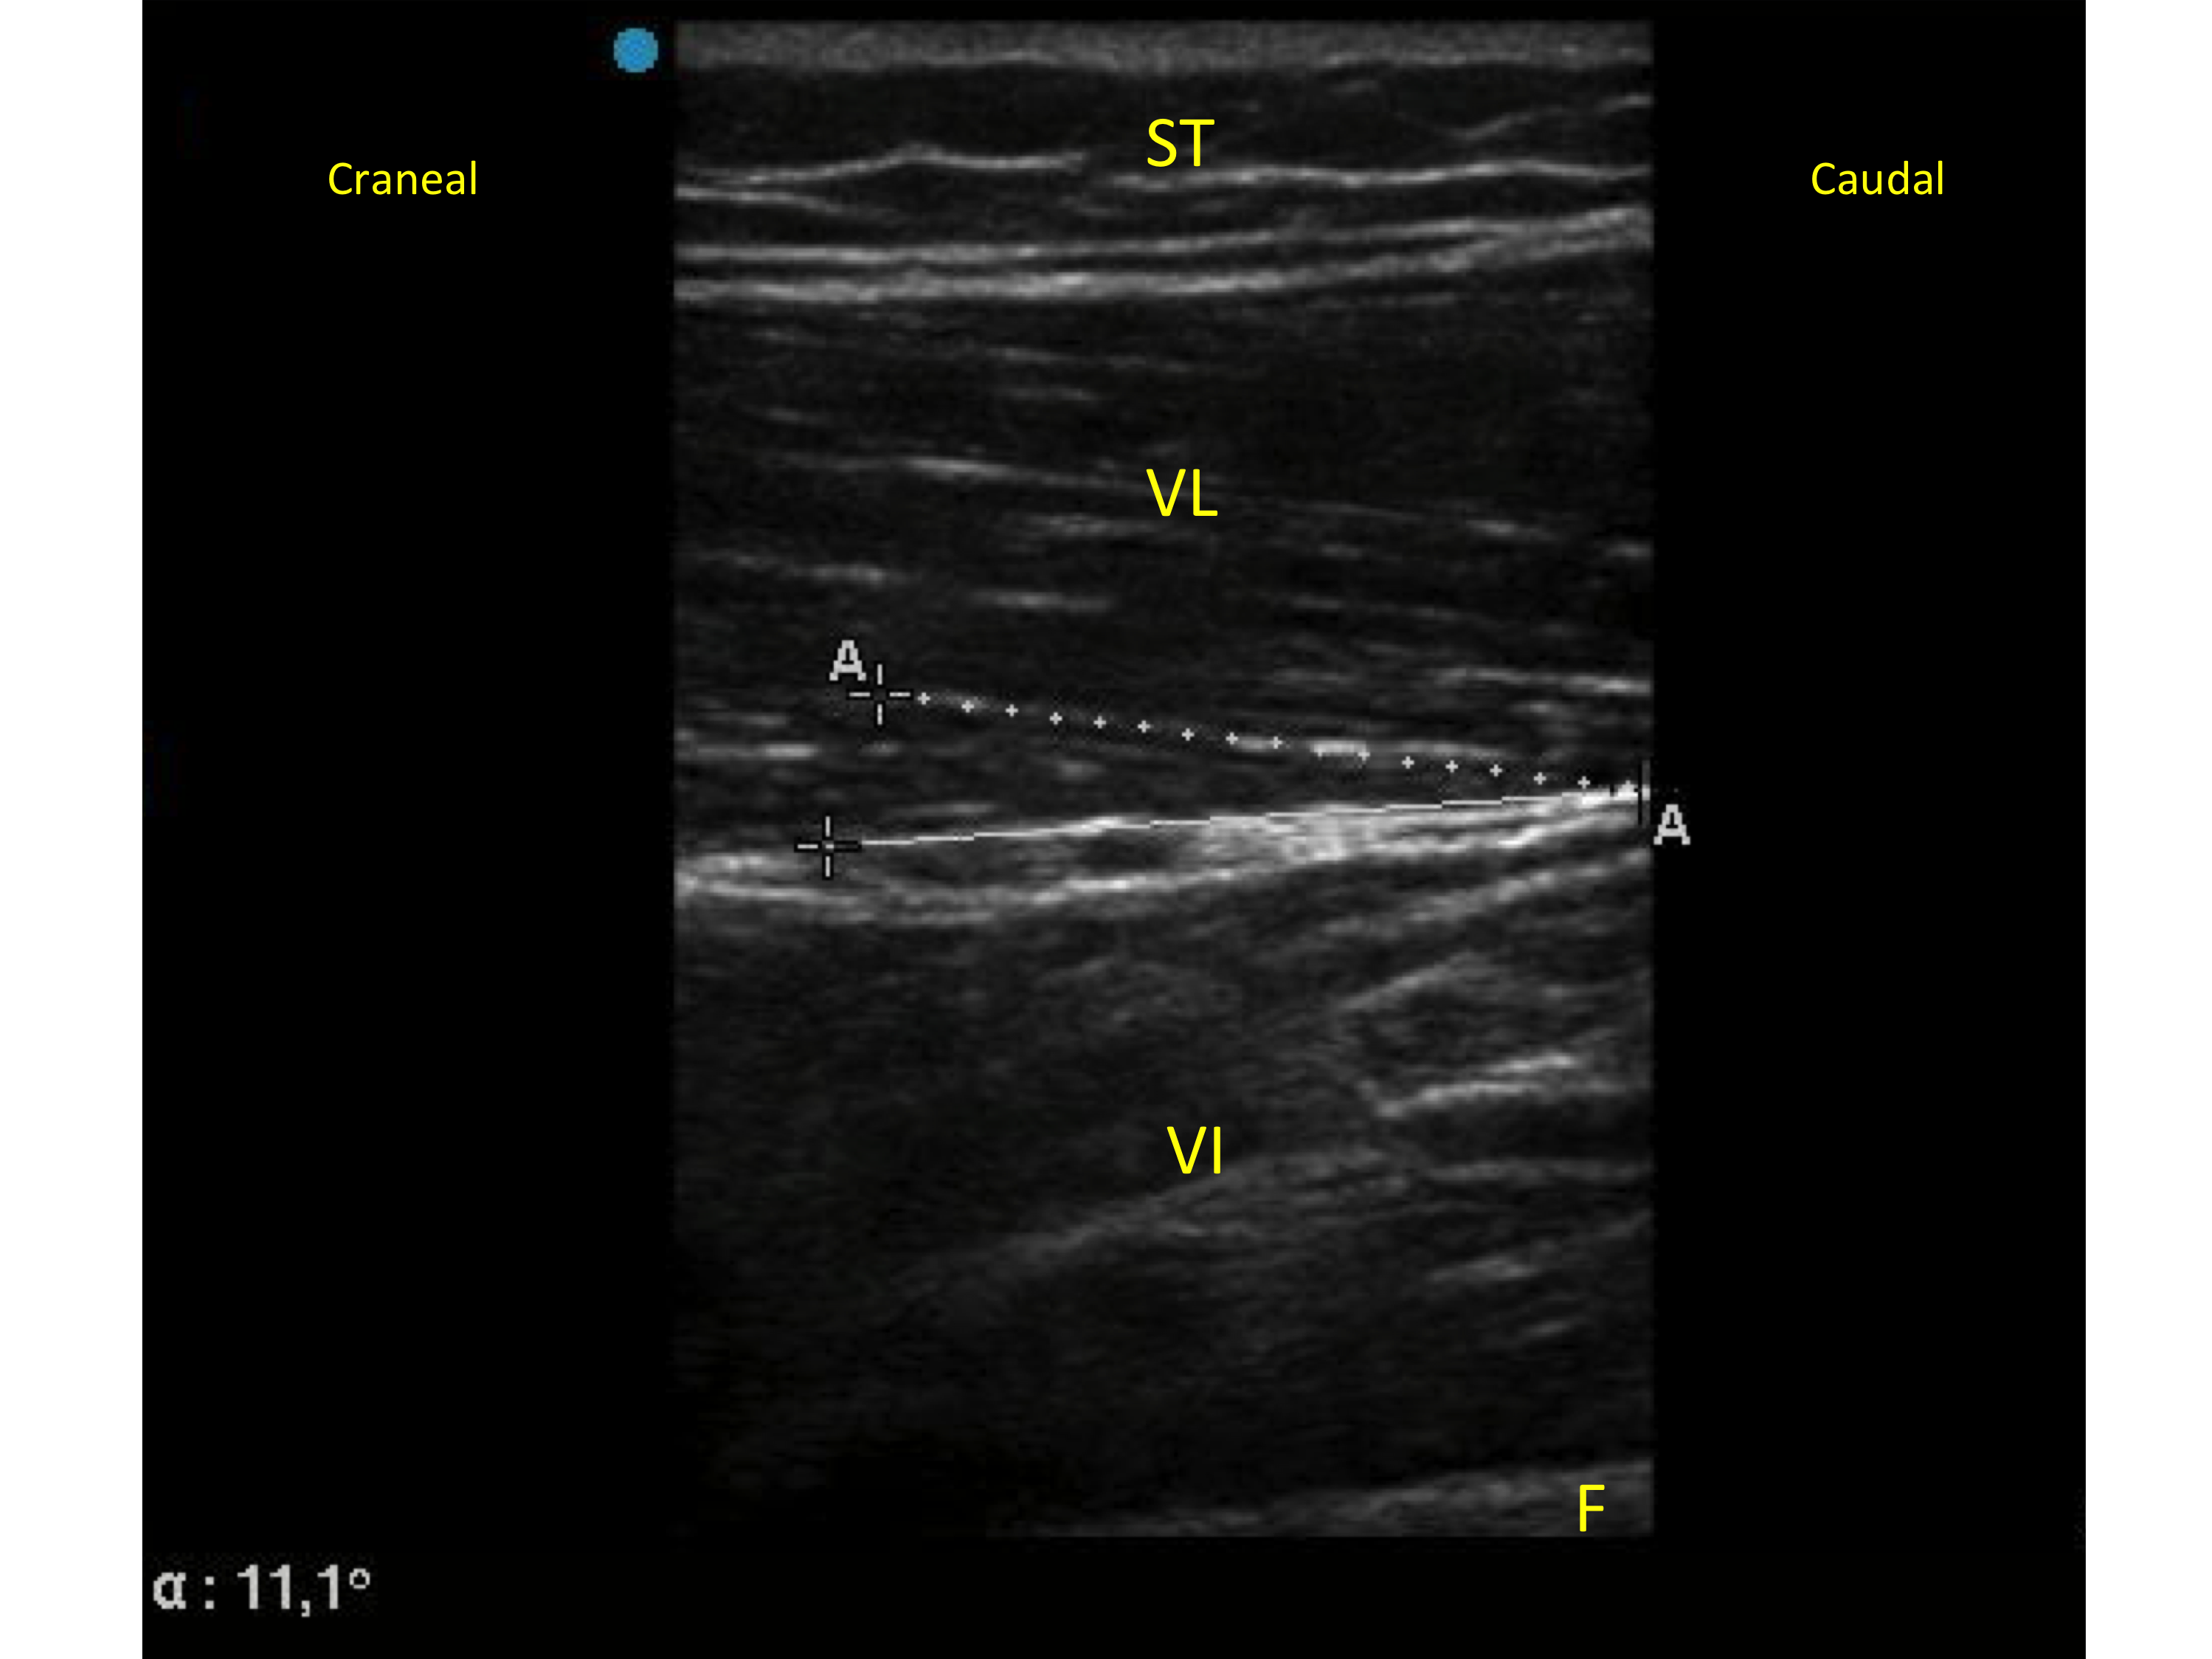
**

**Figure S2.** “Feathered pattern“ in a sagittal view of quadriceps. α = Vastus lateralis pennation angle, ST = subcutaneous tissue, VL = vastus lateralis, VI = vastus intermedius, F = femur
